# Supplementary material for: Functional Adaptation of a Plant Receptor- Kinase Paved the Way for the Evolution of Intracellular Root Symbioses with Bacteria
Source: PubMed Central journal article supplement (PMC2270324; doi:10.1371/journal.pbio.0060068), 2008-03-04

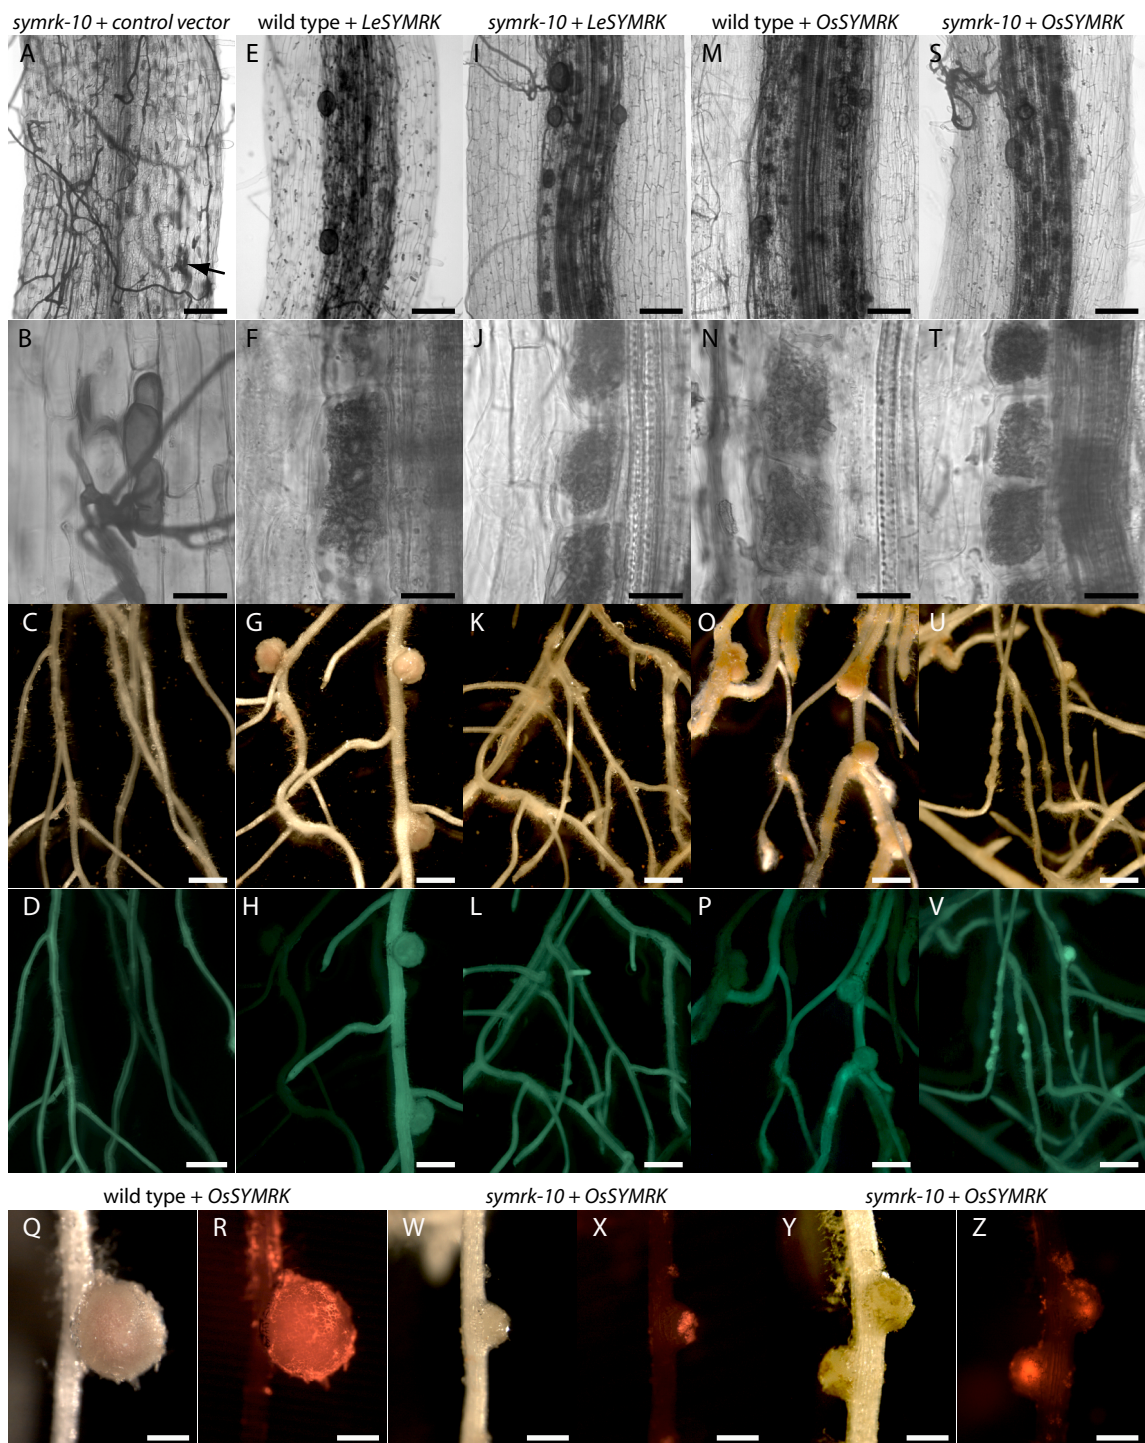

Supplement: pbio.0060068.sg003.pdf [file pbio.0060068.sg003.pdf]
